# Supplementary material for: Segmental Evaluation of Thoracic Aortic Calcium and Their Relations with Cardiovascular Risk Factors in the Brazilian Longitudinal Study of Adult Health (ELSA-Brasil)
Source: Cells. 2021 May 18;10(5):1243. doi: 10.3390/cells10051243 (PMC8158124; doi:10.3390/cells10051243)
Supplement: Supplementary file 1 [file cells-10-01243-s001.zip › cells-1179727-SI.pdf]

# Supplementary Materials

**Table S1.** Blood pressure and other cardiovascular risk factors associated with the presence of calcium in each aortic thoracic segments in the final multivariate analysis. ELSA-Brasil, 2015–2016.

| Variables                                  | AAC > 0                   | ATAC > 0                  | DTAC > 0                  | ADTAC > 0                 |
|--------------------------------------------|---------------------------|---------------------------|---------------------------|---------------------------|
| Age (years)                                | <b>1.11 (1.10–1.13) ‡</b> | <b>1.09 (1.07–1.11) ‡</b> | <b>1.11 (1.09–1.12) ‡</b> | <b>1.11 (1.09–1.12) ‡</b> |
| Women                                      | 0.95 (0.78–1.16)          | 1.16 (0.93–1.44)          | 0.87 (0.71–1.06)          | 0.97 (0.80–1.18)          |
| Educational level                          |                           |                           |                           |                           |
| University degree                          | 1.00                      | 1.00                      | 1.00                      | 1.00                      |
| Complete secondary                         | 1.15 (0.92–1.44)          | 1.00 (0.78–1.28)          | 0.99 (0.79–1.25)          | 1.04 (0.83–1.30)          |
| Complete elementary                        | 1.72 (0.98–3.02)          | 0.91 (0.56–1.49)          | 0.90 (0.57–1.43)          | 0.79 (0.50–1.25)          |
| Incomplete elementary                      | 1.66 (0.91–3.04)          | <b>1.68 (1.02–2.78) *</b> | 1.60 (0.97–2.64)          | <b>1.99 (1.17–3.36) *</b> |
| Smoker                                     |                           |                           |                           |                           |
| Never                                      | 1.00                      | 1.00                      | 1.00                      | 1.00                      |
| Past                                       | <b>1.26 (1.01–1.58) *</b> | <b>1.80 (1.42–2.27) ‡</b> | 0.94 (0.75–1.18)          | 1.16 (0.93–1.43)          |
| Current                                    | <b>2.09 (1.47–2.95) ‡</b> | <b>2.55 (1.81–3.60) ‡</b> | <b>1.79 (1.30–2.48) ‡</b> | <b>1.90 (1.38–2.61) ‡</b> |
| Physical activity                          |                           |                           |                           |                           |
| Insufficient                               | 1.00                      | 1.00                      | 1.00                      | 1.00                      |
| Moderate                                   | 1.21 (0.94–1.54)          | <b>1.36 (1.05–1.76) *</b> | 0.85 (0.66–1.09)          | 0.96 (0.75–1.22)          |
| Vigorous                                   | 1.01 (0.72–1.42)          | 1.30 (0.87–1.94)          | 1.23 (0.85–1.78)          | 1.27 (0.89–1.81)          |
| Family history of CVD                      | <b>1.37 (1.12–1.68) †</b> | 1.17 (0.94–1.45)          | 1.07 (0.87–1.31)          | 1.13 (0.93–1.39)          |
| Body mass index (kg/m <sup>2</sup> )       | <b>1.05 (1.03–1.07) ‡</b> | <b>1.06 (1.03–1.08) ‡</b> | <b>1.04 (1.02–1.06) ‡</b> | <b>1.0 (1.0–1.1) ‡</b>    |
| Systolic blood pressure (mmHg)             | 1.01 (1.00–1.02)          | 1.01 (1.00–1.02)          | <b>1.02 (1.01–1.03) ‡</b> | <b>1.01 (1.00–1.03) *</b> |
| Diastolic blood pressure (mmHg)            | 1.00 (1.00–1.01)          | 1.00 (0.98–1.02)          | 1.00 (0.98–1.01) ‡        | 1.00 (0.99–1.02)          |
| Dyslipidemia                               | 1.17 (0.96–1.43)          | <b>1.70 (1.37–2.10) ‡</b> | <b>1.26 (1.03–1.53) *</b> | <b>1.48 (1.22–1.79) ‡</b> |
| Use of blood pressure lowering medications | <b>1.56 (1.25–1.93) ‡</b> | <b>1.52 (1.22–1.91) ‡</b> | <b>1.82 (1.48–2.25) ‡</b> | <b>1.82 (1.49–2.23) ‡</b> |
| Diabetes                                   | 1.06 (0.79–1.41)          | <b>1.31 (1.00–1.71) *</b> | 1.28 (0.99–1.66)          | <b>1.42 (1.09–1.84) †</b> |

Data are expressed as odds ratio (95% confidence interval). \*  $p \leq 0.05$ ; †  $p \leq 0.01$ ; ‡  $p \leq 0.001$ . AAC indicates aortic arch calcium; ATAC, ascending thoracic aortic calcium; CVD, cardiovascular disease; DTAC, descending thoracic aortic calcium; ADTAC, ascending plus descending thoracic aortic calcium.

**Table S2.** Cardiovascular risk factors associated with the presence of calcium in the thoracic aortic segments after adjustments for body surface in the final multivariate analysis. ELSA-Brasil, 2015–2016.

| Variables             | AAC > 0                   | ATAC > 0                  | DTAC > 0                  | ADTAC > 0                 |
|-----------------------|---------------------------|---------------------------|---------------------------|---------------------------|
| Age (years)           | <b>1.12 (1.10–1.13) ‡</b> | <b>1.09 (1.08–1.11) ‡</b> | <b>1.11 (1.10–1.13) ‡</b> | <b>1.11 (1.10–1.13) ‡</b> |
| Women                 | 0.86 (0.65–1.14)          | 1.11 (0.82–1.52)          | 0.76 (0.57–1.01)          | 0.87 (0.66–1.15)          |
| Educational level     |                           |                           |                           |                           |
| University degree     | 1.00                      | 1.00                      | 1.00                      | 1.00                      |
| Complete secondary    | 1.15 (0.92–1.44)          | 1.01 (0.78–1.30)          | 1.01 (0.80–1.27)          | 1.06 (0.85–1.32)          |
| Complete elementary   | 1.73 (0.98–3.04)          | 0.93 (0.57–1.51)          | 0.92 (0.58–1.46)          | 0.81 (0.51–1.28)          |
| Incomplete elementary | 1.62 (0.89–2.97)          | <b>1.79 (1.08–2.94) *</b> | <b>1.68 (1.02–2.77) *</b> | <b>2.04 (1.21–3.44) †</b> |
| Smoker                |                           |                           |                           |                           |
| Never                 | 1.00                      | 1.00                      | 1.00                      | 1.00                      |
| Past                  | <b>1.26 (1.01–1.57) *</b> | <b>1.79 (1.42–2.26) ‡</b> | 0.93 (0.74–1.16)          | 1.15 (0.93–1.42)          |
| Current               | <b>2.08 (1.47–2.94) ‡</b> | <b>2.53 (1.80–3.56) ‡</b> | <b>1.77 (1.28–2.44) ‡</b> | <b>1.87 (1.36–2.57) ‡</b> |
| Physical activity     |                           |                           |                           |                           |
| Insufficient          | 1.00                      | 1.00                      | 1.00                      | 1.00                      |

|                                      |                           |                           |                           |                           |
|--------------------------------------|---------------------------|---------------------------|---------------------------|---------------------------|
| Moderate                             | 1.22 (0.95–1.55)          | <b>1.36 (1.05–1.76) *</b> | 0.85 (0.67–1.10)          | 0.95 (0.75–1.21)          |
| Vigorous                             | 1.03 (0.74–1.45)          | 1.32 (0.89–1.98)          | 1.27 (0.88–1.83)          | 1.29 (0.91–1.84)          |
| Family history of CVD                | <b>1.37 (1.12–1.68) †</b> | 1.18 (0.95–1.47)          | 1.09 (0.88–1.33)          | 1.15 (0.94–1.40)          |
| Body mass index (kg/m <sup>2</sup> ) | <b>1.06 (1.03–1.10) ‡</b> | <b>1.06 (1.03–1.10) ‡</b> | <b>1.05 (1.02–1.09) ‡</b> | <b>1.06 (1.02–1.09) ‡</b> |
| Body surface (m <sup>2</sup> )       | 0.88 (0.69–1.13)          | 0.98 (0.75–1.28)          | 0.89 (0.69–1.14)          | 0.92 (0.72–1.17)          |
| Dyslipidemia                         | 1.20 (0.98–1.46)          | <b>1.73 (1.40–2.15) ‡</b> | <b>1.29 (1.06–1.58) *</b> | <b>1.51 (1.25–1.84) ‡</b> |
| Hypertension                         | <b>1.52 (1.24–1.88) ‡</b> | <b>1.62 (1.30–2.03) ‡</b> | <b>2.09 (1.71–2.57) ‡</b> | <b>1.96 (1.61–2.39) ‡</b> |
| Diabetes                             | 1.06 (0.80–1.42)          | <b>1.34 (1.03–1.75) *</b> | <b>1.33 (1.03–1.71) *</b> | <b>1.45 (1.12–1.88) †</b> |

Data are expressed as odds ratio (95% confidence interval). \*  $p \leq 0.05$ ; †  $p \leq 0.01$ ; ‡  $p \leq 0.001$ . AAC indicates aortic arch calcium; ATAC, ascending thoracic aortic calcium; CVD, cardiovascular disease; DTAC, descending thoracic aortic calcium; ADTAC, ascending plus descending thoracic aortic calcium.
